# Supplementary material
Source: PubMed Central journal article supplement (PMC4621269)

Online Supporting Material

**SUPPLEMENTAL TABLE 1**

A summary of the foods that loaded on each dietary pattern in the exploratory factor analysis and those foods included in the Confirmatory Factor Analysis. *Adapted from (Ryman, 2013)<sup>(7)</sup>*

| Dietary Patterns                                                                                                                                                                                   |                                                                                                                                                                                |                                                                                                                         | Exploratory<br>Factor<br>Analysis<br>Loading | Included in<br>Confirmatory<br>Factor<br>Analysis |
|----------------------------------------------------------------------------------------------------------------------------------------------------------------------------------------------------|--------------------------------------------------------------------------------------------------------------------------------------------------------------------------------|-------------------------------------------------------------------------------------------------------------------------|----------------------------------------------|---------------------------------------------------|
| Processed foods                                                                                                                                                                                    | Fruits and<br>vegetables                                                                                                                                                       | Subsistence foods                                                                                                       |                                              |                                                   |
| <ul style="list-style-type: none"> <li>▪ Salty snacks</li> <li>▪ Sweetened cereals</li> <li>▪ Pizza</li> <li>▪ Sweetened drinks</li> <li>▪ Hot dogs/lunch meat</li> <li>▪ Fried chicken</li> </ul> | <ul style="list-style-type: none"> <li>▪ Fresh citrus</li> <li>▪ Potato salad</li> <li>▪ Citrus juice</li> <li>▪ Corn</li> <li>▪ Green beans</li> <li>▪ Green salad</li> </ul> | <ul style="list-style-type: none"> <li>▪ Seal or walrus soup</li> <li>▪ Non-oily fish</li> <li>▪ Wild greens</li> </ul> | > 0.35                                       | Yes                                               |
| <ul style="list-style-type: none"> <li>▪ Canned tuna</li> </ul>                                                                                                                                    | <ul style="list-style-type: none"> <li>▪ Market berries in akutaq</li> </ul>                                                                                                   | <ul style="list-style-type: none"> <li>▪ Bird soup</li> </ul>                                                           | $\leq 0.35$                                  |                                                   |
|                                                                                                                                                                                                    | <ul style="list-style-type: none"> <li>▪ Pudding and Jello</li> <li>▪ Dried Salmon</li> <li>▪ Wild game soup</li> <li>▪ Pancakes</li> </ul>                                    |                                                                                                                         | $\leq 0.35$                                  | No                                                |

**SUPPLEMENTAL TABLE 2**

Formulas used for calculating dietary pattern scores. Specifically, scores were calculated as the sum of the natural log transformed frequency of consumption for each food measuring the dietary pattern divided by the number of foods measuring each dietary pattern.

| Dietary Pattern       | Formula                                                                                                                                                                                                                                                                                                                                                                                                            |
|-----------------------|--------------------------------------------------------------------------------------------------------------------------------------------------------------------------------------------------------------------------------------------------------------------------------------------------------------------------------------------------------------------------------------------------------------------|
| Processed foods       | (natural log annual frequency for <b>salty snacks</b> + natural log annual frequency for <b>sweetened cereals</b> + natural log annual frequency for <b>pizza</b> + natural log annual frequency for <b>sweetened drinks</b> + natural log annual frequency for <b>hot dogs and lunch meat</b> + natural log annual frequency for <b>fried chicken</b> + natural log annual frequency for <b>canned tuna</b> ) / 7 |
| Fruits and vegetables | (natural log annual frequency for <b>fresh citrus</b> + natural log annual frequency for <b>potato salad</b> + natural log annual frequency for <b>citrus juice</b> + natural log annual frequency for <b>corn</b> + natural log annual frequency for <b>green beans</b> + natural log annual frequency for <b>green salad</b> + natural log annual frequency for <b>market berries in akutaq</b> ) / 7            |
| Subsistence foods     | (natural log annual frequency for <b>seal or walrus soup</b> + natural log annual frequency for <b>non-oily fish</b> + natural log annual frequency for <b>wild greens</b> + natural log annual frequency for <b>bird soup</b> ) / 4                                                                                                                                                                               |

Online Supporting Material

**SUPPLEMENTAL FIGURE 1**

Percent frequency distributions of estimated dietary pattern factor scores for each of the three dietary patterns: A) Processed foods; B) Fruits and vegetables; and C) Subsistence foods, with the normal and Gaussian kernel density curves superimposed. Yupik study participants (n=637), September 2009 – May 2013.

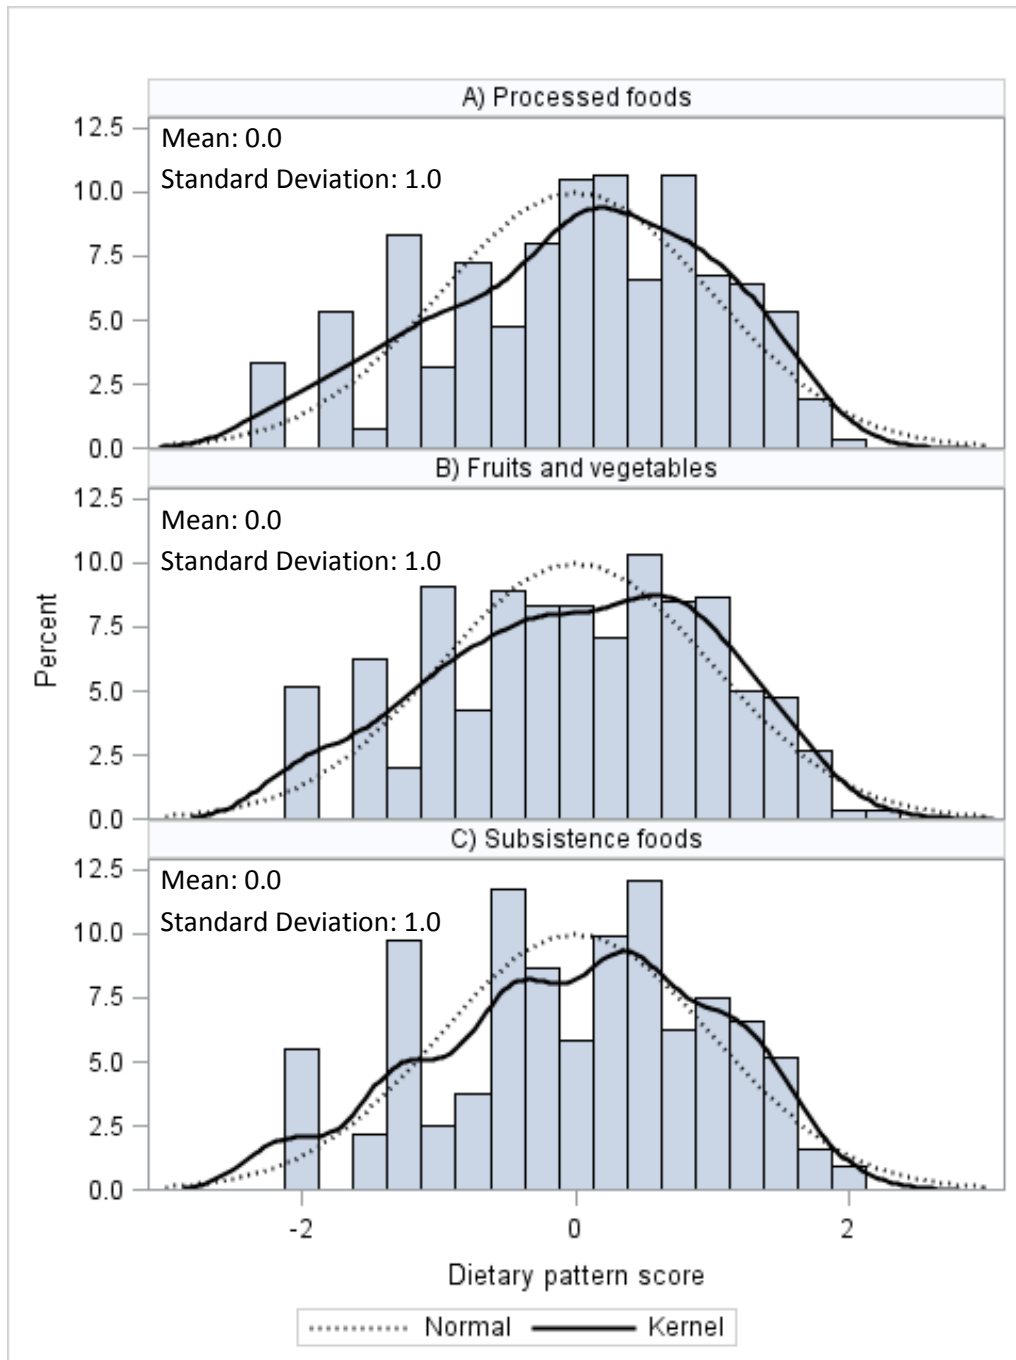

Supplement: NIHMS718967-supplement-Supplemental.pdf [file NIHMS718967-supplement-Supplemental.pdf]
